# Supplementary material
Source: Royal Society of Chemistry journal article supplement (doi:10.1039/d6nj00262e)
Supplement: d6nj00262e1.pdf [file d6nj00262e1.pdf]

## Supporting Information

### **In-situ synthesis of zeolite FeZSM-5 derived from coal gangue for phenol degradation**

*Hongze Zhang<sup>a</sup>, Shanfang Liu<sup>a</sup>, Xiaoxia Ma<sup>a</sup>, Dapeng Zhang<sup>a</sup>, Yun Li<sup>a\*</sup>, Jilin Cao<sup>a</sup>*

Engineering Research Center of Seawater Utilization Technology of Ministry of Education,  
School of Chemical Engineering and Technology, Hebei University of Technology, Tianjin,  
300401, China

\*Corresponding author:

Email address: liyun@hebut.edu.cn (Y. Li)

Postal address: No. 5340, Xiping Road, Beichen District, Tianjin, China

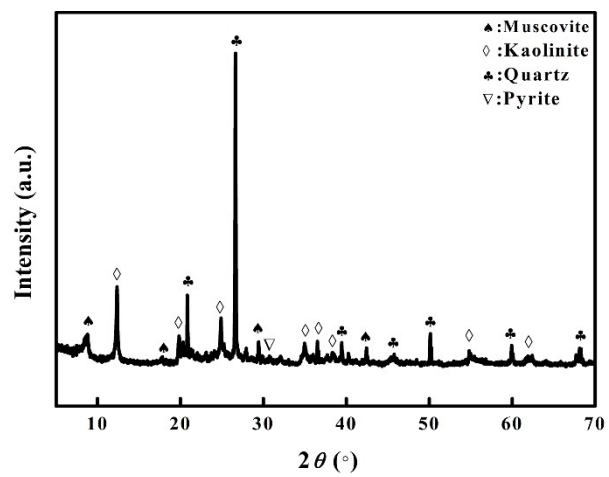

**Fig. S1.** XRD pattern of CG

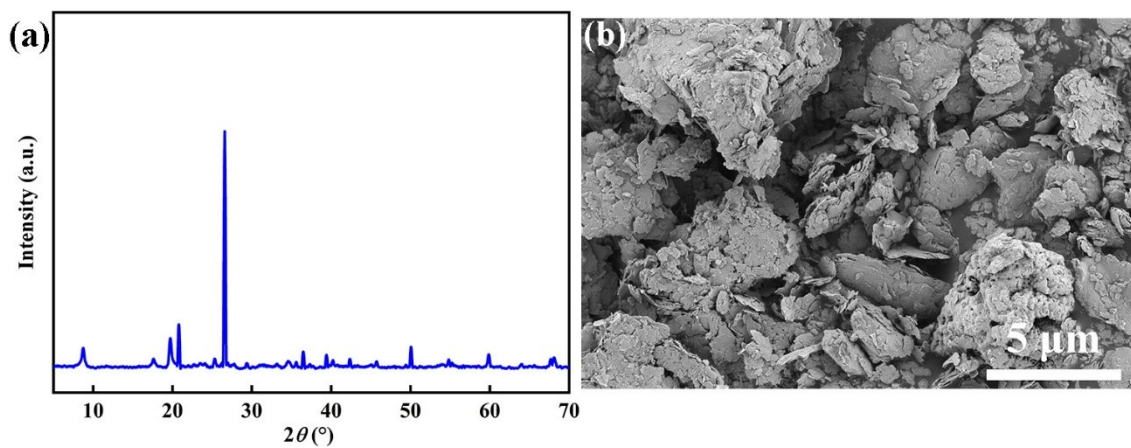

**Fig. S2.** XRD pattern (a) and SEM image (b) of CG after calcination at 800 °C.

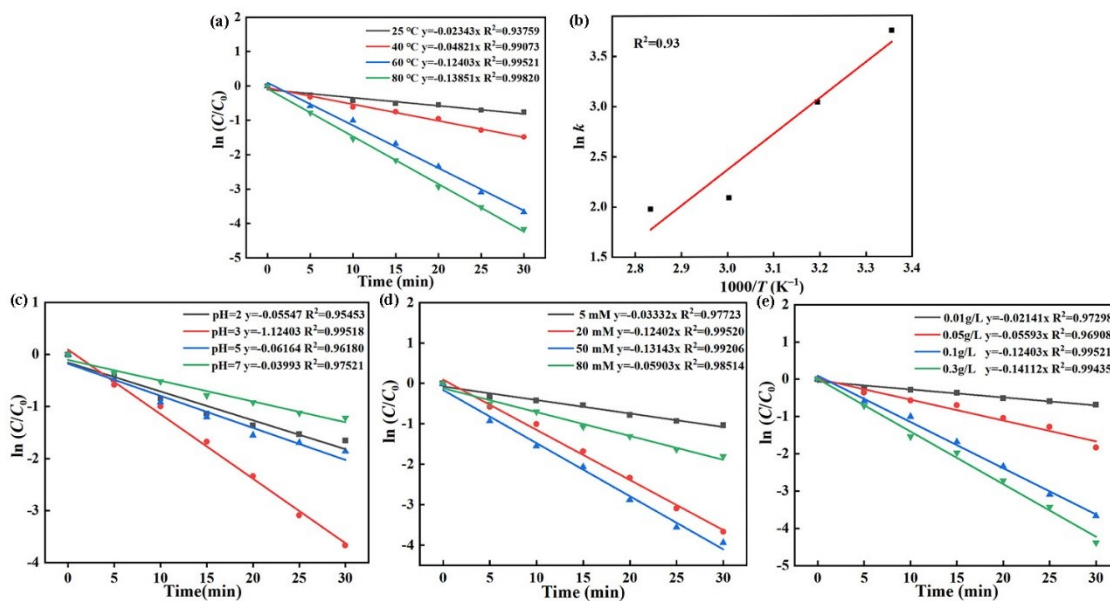

**Fig. S3.** Linear fitting of  $\ln(C/C_0)$  versus reaction time (a) and  $\ln k$  versus  $1/T$  (b) at different temperatures. Kinetics curve of pH value (c), H<sub>2</sub>O<sub>2</sub> concentrations (d), and zeolite FeZSM-5-CG dosages (e).

**Table S1.** Chemical Compositions of CG (wt.%)

| Component | SiO <sub>2</sub> | Al <sub>2</sub> O <sub>3</sub> | Fe <sub>2</sub> O <sub>3</sub> | K <sub>2</sub> O | CaO  | TiO <sub>2</sub> | MgO   | SO <sub>3</sub> | Other  | LOI  |
|-----------|------------------|--------------------------------|--------------------------------|------------------|------|------------------|-------|-----------------|--------|------|
| Mass, %   | 60.53            | 23.01                          | 4.63                           | 4.28             | 3.42 | 1.51             | 0.682 | 1.53            | 0.3537 | 19.5 |

LOI: loss on ignition

**Table S2.** Percentages of different iron species calculated from deconvolution of the UV-Vis spectra of zeolite FeZSM-5-CG and FeZSM-5-CR

| zeolites   | Fe <sub>1</sub> |          | Fe <sub>2</sub> |          | Fe <sub>3</sub> |          |
|------------|-----------------|----------|-----------------|----------|-----------------|----------|
|            | Center (nm)     | Area (%) | Center (nm)     | Area (%) | Center (nm)     | Area (%) |
| FeZSM-5-CG | 214             | 60       | 315             | 33       | 520             | 7        |
| FeZSM-5-CR | 238             | 67       | 318             | 30       | 520             | 3        |

Fe<sub>1</sub>: iron of tetrahedral coordination; Fe<sub>2</sub>: iron outside the framework; Fe<sub>3</sub>: Fe<sub>x</sub>O<sub>y</sub> particles on the zeolite surface

**Table S3.** Deconvolution parameters of the Fe 2p<sub>3/2</sub> peaks for the samples of FeZSM-5-CG and FeZSM-5-CR

| zeolites   | Fe <sup>2+</sup> |        | Fe <sup>3+</sup> |         | Fe <sup>3+</sup> /Fe <sup>2+</sup> |
|------------|------------------|--------|------------------|---------|------------------------------------|
|            | Position (eV)    | Area   | Position (eV)    | Area    | Ratio                              |
| FeZSM-5-CG | 710.5            | 6826.6 | 716.5            | 6480.59 | 0.949                              |
| FeZSM-5-CR | 709.2            | 6290.2 | 713.6            | 3136.29 | 0.499                              |

**Table S4** Texture parameters of zeolites FeZSM-5-CG and FeZSM-5-CR samples

| Sample     | Average pore (nm) | S <sub>BET</sub> (m <sup>2</sup> /g) | V <sub>micro</sub> (cm <sup>3</sup> /g) | V <sub>meso</sub> (cm <sup>3</sup> /g) |
|------------|-------------------|--------------------------------------|-----------------------------------------|----------------------------------------|
| FeZSM-5-CG | 2.45              | 242.64                               | 0.08                                    | 0.07                                   |
| FeZSM-5-CR | 2.45              | 154.32                               | 0.05                                    | 0.04                                   |

**Table S5** Statistical Analysis of Catalyst Stability Based on Parallel Experiments

| Parameter                         | 1st cycle (fresh catalyst) | 5th cycle (recycled catalyst) | Statistical test results |
|-----------------------------------|----------------------------|-------------------------------|--------------------------|
| Phenol removal efficiency (Run 1) | 97.46%                     | 95.10%                        |                          |
| Phenol removal efficiency (Run 2) | 97.32%                     | 94.95%                        |                          |
| Phenol removal efficiency (Run 3) | 97.38%                     | 95.01%                        |                          |
| Mean value                        | 97.39%                     | 95.02%                        |                          |
| Standard deviation                | 0.0704%                    | 0.0755%                       |                          |
| <i>t</i> -value                   |                            |                               | 39.76                    |
| <i>P</i> -value                   |                            |                               | <0.001                   |
